# Supplementary material for: The mechanosensitive ion channel PIEZO1 promotes satellite cell function in muscle regeneration
Source: Life Sci Alliance. 2022 Nov 29;6(2):e202201783. doi: 10.26508/lsa.202201783 (PMC9711862; doi:10.26508/lsa.202201783)
Supplement: Supplementary file 2 [file LSA-2022-01783_TableS1.xlsx]

## Sheet: Sheet1
qPCR
Target		Sequence
Piezo1	F	ATCCTGCTGTATGGGCTGAC
	R	AAGGGTAGCGTGTGTGTTCC
18s	F	TTCTGGCCAACGGTCTAGACAAC
	R	CCAGTGGTCTTGGTGTGCTGA
Genotyping
Target		Sequence
Piezo1flox	F	CCAGTGATTCCTCATGGAATGTGG
	R	CTTAAGCCCATCTCACAGCTGAAGC
Pax7CreERT2	F	TACCAGAGGCAACAAACAGG
	R	CAAAGGTGGCTAAGGTGGAG
Rosa26YFP	F	AAGTTCATCTGCACCACCG
	R	TCCTTGAAGAAGATGGTGCG
Piezo1tdTomato	F1	GACAGGATTGTGGGGCTGTACGTC
	F2	CACCTGTTCCTGTACGGCATGGAC
	R	GCAGCTACACTCCAACCCAAGGAG
Piezo1LacZ	F	GGGATCTCATGCTGGAGTTCTTCG
	R	CTTAAGCCCATCTCACAGCTGAAGC
