# Supplementary material for: The mechanosensitive ion channel PIEZO1 promotes satellite cell function in muscle regeneration
Source: Life Sci Alliance. 2022 Nov 29;6(2):e202201783. doi: 10.26508/lsa.202201783 (PMC9711862; doi:10.26508/lsa.202201783)
Supplement: Supplementary file 4 [file LSA-2022-01783_TableS3.xlsx]

## Sheet: Sheet1
Purpose			Sequence
Barcoded primer for reverse transcription		wild type 1	AAGCAGTGGTATCAACGCAGAGTACGACGCTCTTCCGATCTGCCATTCTCCNNNNNNNNTTTTTTTTTTTTTTTTTTTTTTTTTTTTVN
		wild type 2	AAGCAGTGGTATCAACGCAGAGTACGACGCTCTTCCGATCTTTACCGAGGCNNNNNNNNTTTTTTTTTTTTTTTTTTTTTTTTTTTTVN
		wild type 3	AAGCAGTGGTATCAACGCAGAGTACGACGCTCTTCCGATCTTCGGCCTTACNNNNNNNNTTTTTTTTTTTTTTTTTTTTTTTTTTTTVN
		Piezo1 cKO 1	AAGCAGTGGTATCAACGCAGAGTACGACGCTCTTCCGATCTGGCGTTAAGGNNNNNNNNTTTTTTTTTTTTTTTTTTTTTTTTTTTTVN
		Piezo1 cKO 2	AAGCAGTGGTATCAACGCAGAGTACGACGCTCTTCCGATCTCAACCGCTAANNNNNNNNTTTTTTTTTTTTTTTTTTTTTTTTTTTTVN
		Piezo1 cKO 3	AAGCAGTGGTATCAACGCAGAGTACGACGCTCTTCCGATCTGAAGATCGAGNNNNNNNNTTTTTTTTTTTTTTTTTTTTTTTTTTTTVN
Template switch oligo			AAGCAGTGGTATCAACGCAGAGTACrGrG+G
PCR primer for SeqAmp			AAGCAGTGGTATCAACGCAGAGT
PCR primer for library			CAAGCAGAAGACGGCATACGAGATTTCTGCCTGTCTCGTGGGCTCGG
			AATGATACGGCGACCACCGAGATCTACACTAGATCGCACACTCTTTCCCTACACGACGCTCTTCCGATCT
